# Supplementary material for: The bioaccessibility of folate in breads and the stability of folate vitamers duringin vitrodigestion
Source: Royal Society of Chemistry journal article supplement (doi:10.1039/d1fo03352b), 2022-01-01
Supplement: d1fo03352b1.pdf [file d1fo03352b1.pdf]

Table S1. Concentration (mg/mL) of the folate calibrant stock solutions (before dilution)

| Folates                                     | Nominal concentration (mg/ml) | Spectrophotometrically confirmed concentration (mg/ml) |
|---------------------------------------------|-------------------------------|--------------------------------------------------------|
| PGA                                         | 1.018                         | 0.908                                                  |
| 10-HCO-H <sub>2</sub> folate                | 0.421                         | 0.281                                                  |
| 10-HCO-PGA                                  | 1.004                         | 1.101                                                  |
| H <sub>4</sub> folate                       | 1.008                         | 0.675                                                  |
| 5-CH <sub>3</sub> -H <sub>4</sub> folate    | 1.037                         | 0.675                                                  |
| 5-HCO-H <sub>4</sub> folate                 | 1.048                         | 0.694                                                  |
| 5,10-CH <sup>+</sup> -H <sub>4</sub> folate | 1.114                         | 0.909                                                  |

Table S2. The tested activities of the enzymes and the concentration of the bile acid in the bile extract.

| Enzymes or bile                                  | Company       | Lot      | Activity or concentration |
|--------------------------------------------------|---------------|----------|---------------------------|
| $\alpha$ -Amylase from <i>Aspergillus oryzae</i> | Sigma Aldrich | SLBZ1496 | 104.4 U/mg                |
| Pepsin from porcine gastric mucosa               | Sigma Aldrich | BCCB2294 | 574.9 U/mg                |
| Trypsin from porcine pancreas                    | Sigma Aldrich | SLBT2691 | 137.5 U/mg                |
| $\alpha$ -Chymotrypsin from bovine pancreas      | Sigma Aldrich | SLBV2540 | 42.3 U/mg                 |
| Bile from bovine and ovine                       | Sigma Aldrich | B8381    | 1220.9 g/mol              |

Note: the protocols used for the activity tests were referred to Minekus et al., 2014

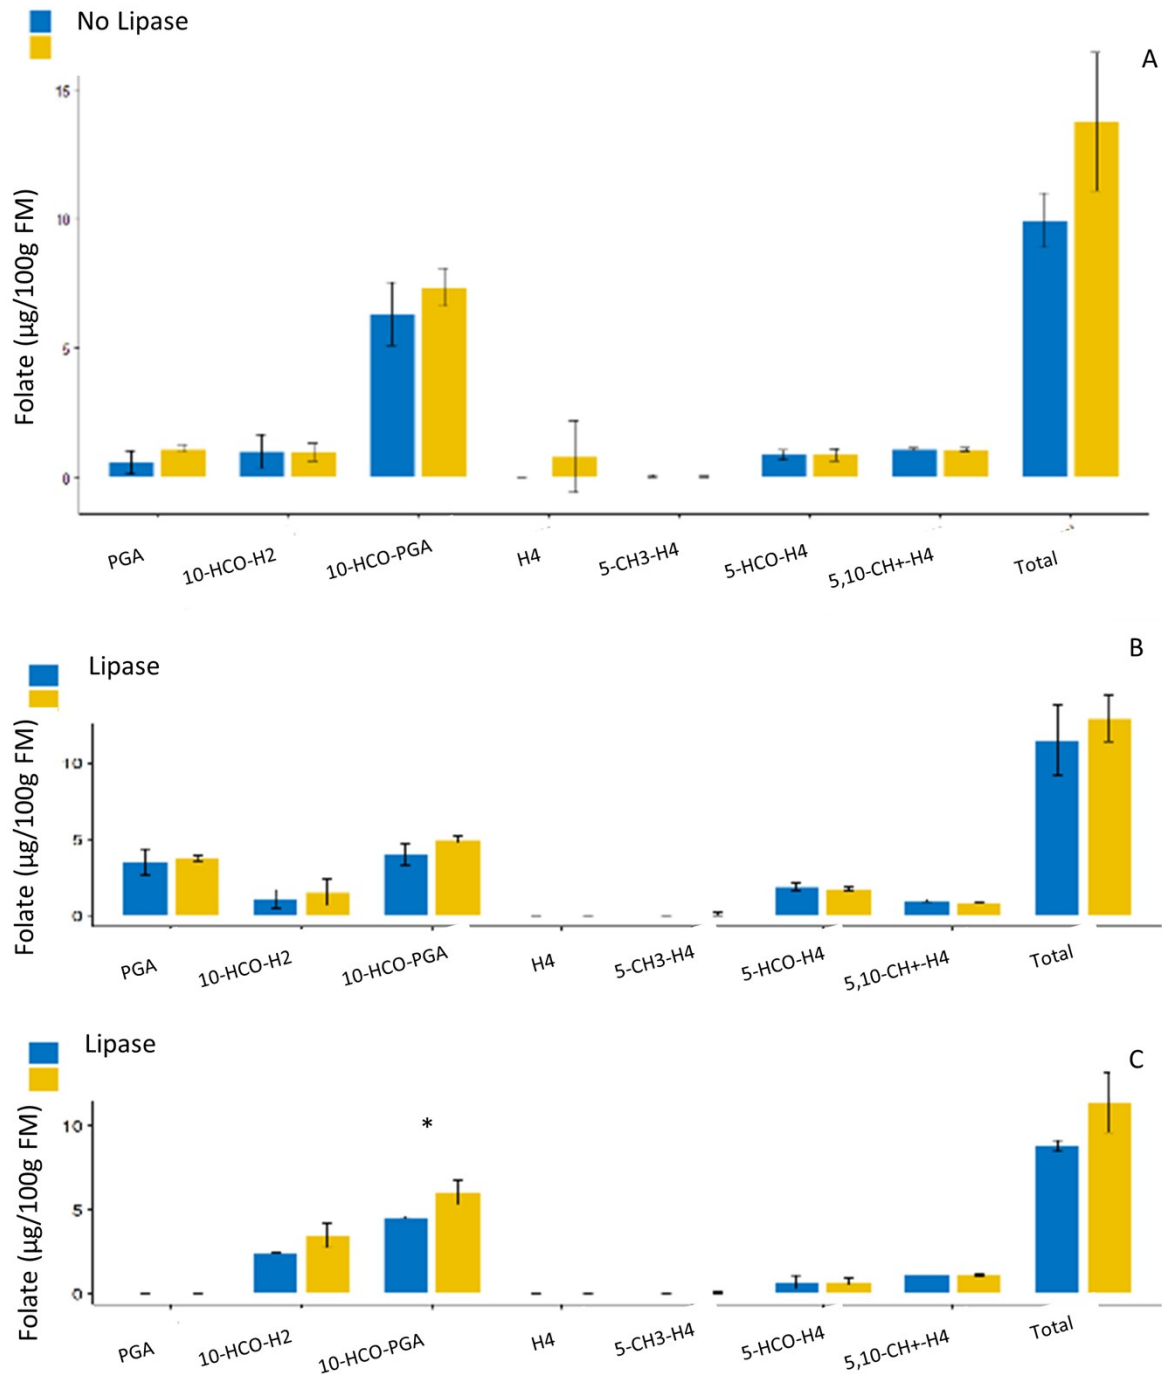

Figure S1. The effect of lipase on the folate level of the selected bread digesta. A, whole-grain oat toast; B, whole-grain oat flat portion bread; C, whole-grain rye toast. “No Lipase” means that bile extract,  $\alpha$ -amylase, trypsin, and chymotrypsin, but not lipase, were used during the intestinal phase; “Pancreatin” means that pancreatin (including lipase) was used during the intestinal phase; “Lipase” means that individual enzymes – bile extract,  $\alpha$ -amylase, trypsin, chymotrypsin as well as lipase from *Candida rugosa* (L1754, Sigma, St Louis, MO, USA) – were used during the intestinal phase. The amount of pancreatin added was based on the tested activity of trypsin (4.1 U/mg) according to the INFOGEST protocol (Minekus et al., 2014), and the amount of lipase from *Candida rugosa* added was based on the labelled activity ( $\geq 700$  U/mg) and the recommended targeted lipase activity (2000 U/mL) described by the INFOGEST protocol. Two sample *t*-tests were performed to study the

differences between folate contents (mean  $\pm$  standard,  $n = 3$ ) of the two different treatments, and \* indicates a significant difference in vitamer contents between different treatments at a level of  $p < 0.05$ .

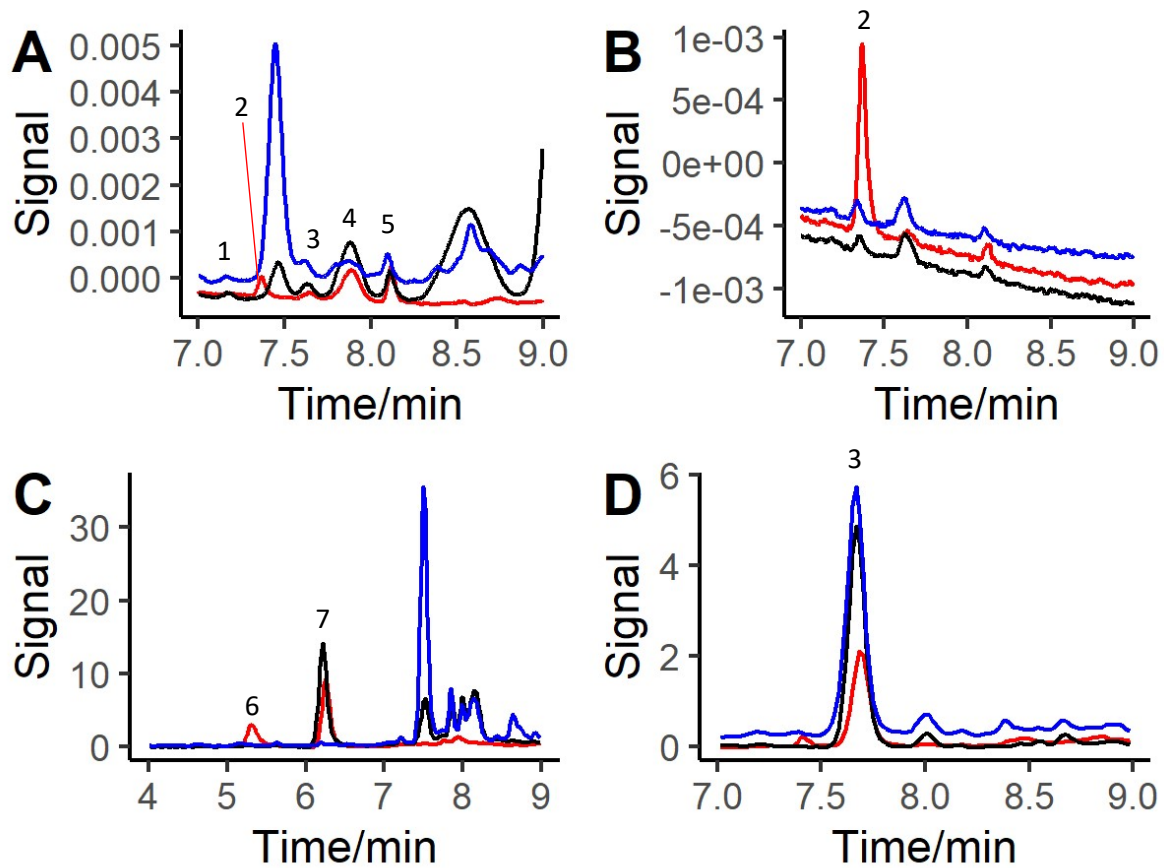

Figure S2. UHPLC chromatograms from different detectors (red: calibrants, black: whole-grain oat toast, blue: whole-grain oat toast digesta). A, photodiode array detector (290 nm); B, photodiode array detector (360 nm); C, fluorescence detector (excitation wavelength: 290 nm; emission wavelength: 356 nm); D, fluorescence detector (excitation wavelength: 360 nm; emission wavelength: 465 nm); vitamer peaks were labelled with numbers: 1, 10-formyldihydrofolate; 2, 5,10-methenyltetrahydrofolate; 3, 10-formylfolic acid; 4, 5-formyltetrahydrofolate; 5, folic acid; 6, tetrahydrofolate; 7, 5-methyltetrahydrofolate.
